# Supplementary material for: Combining Cognitive, Genetic, and Structural Neuroimaging Markers to Identify Individuals with Increased Dementia Risk
Source: PubMed Central journal article supplement — J Alzheimers Dis. 2018 Jun 19;64(2):533–42. doi: 10.3233/JAD-180199 (PMC6027943; doi:10.3233/jad-180199), 2018-06-19

Supplementary Fig. 1. Receiver-operating characteristic curves showing the performance of prediction models, from cognitive, genetic, and MRI modality bases, for dementia at 6 years.

ROC curve – final models

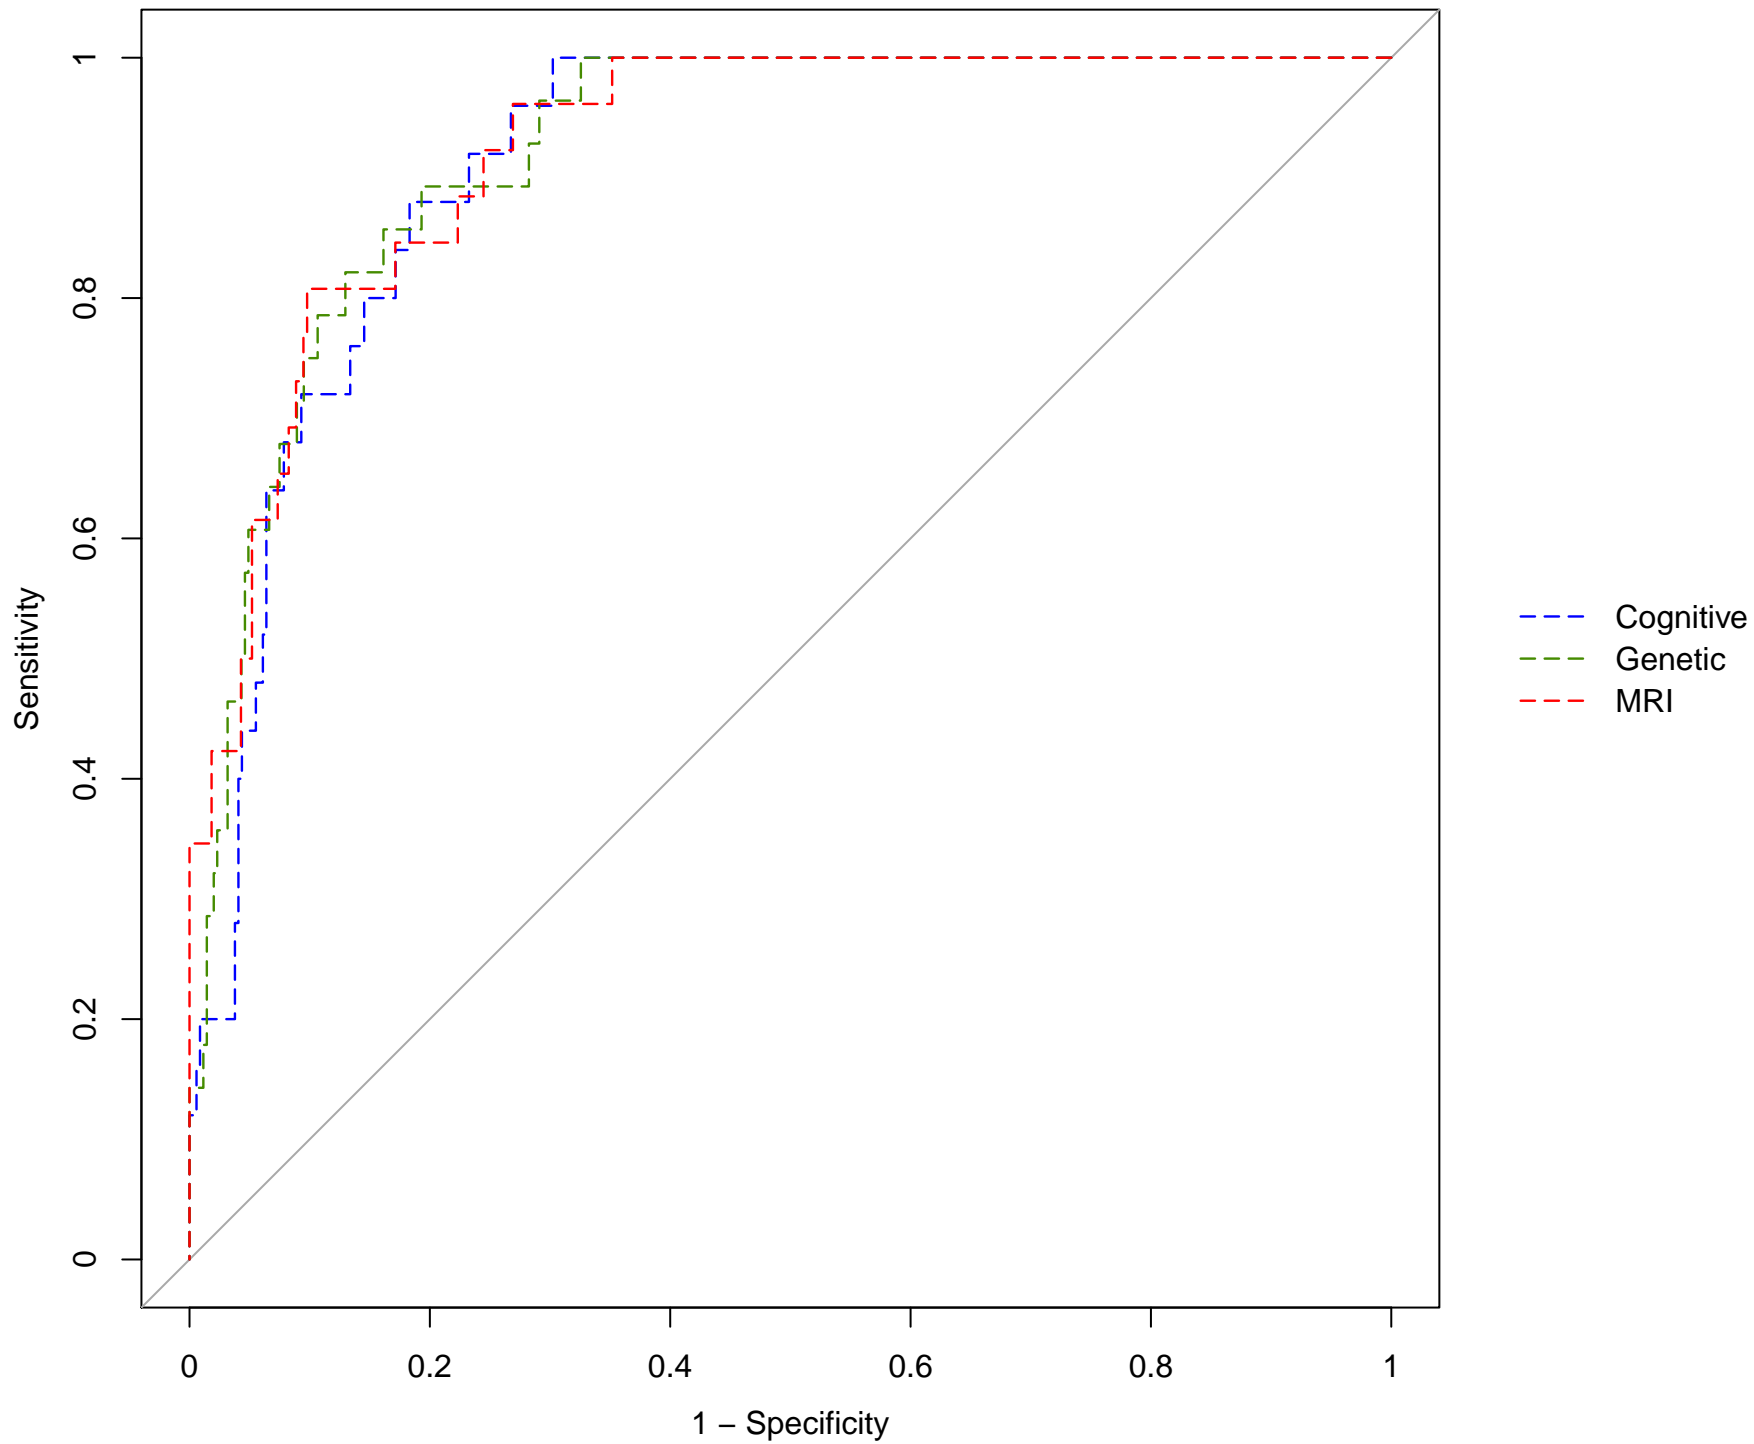

ROC curve – cognitive base

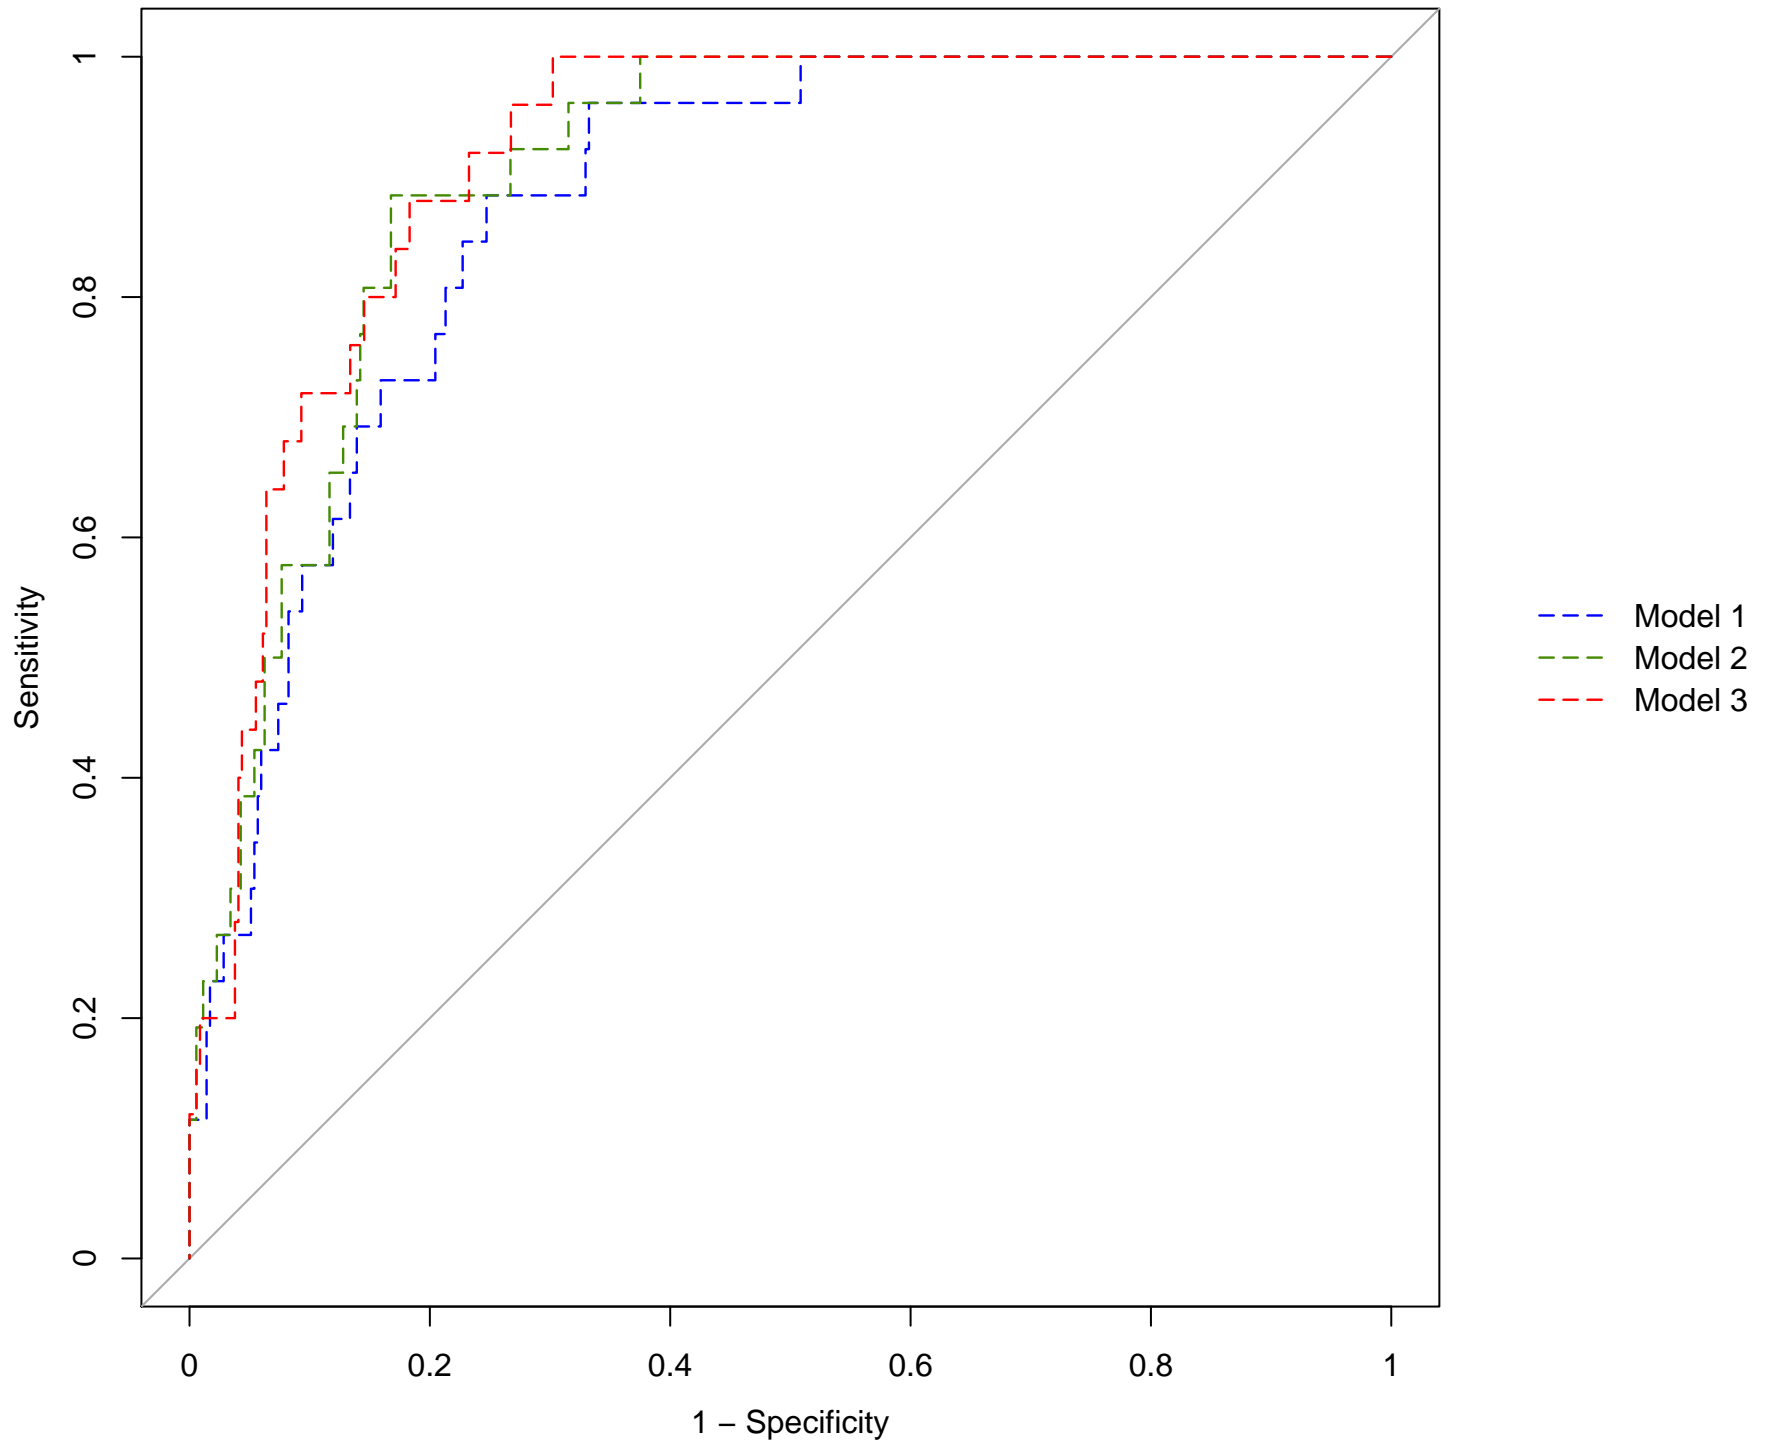

ROC curve – genetic base

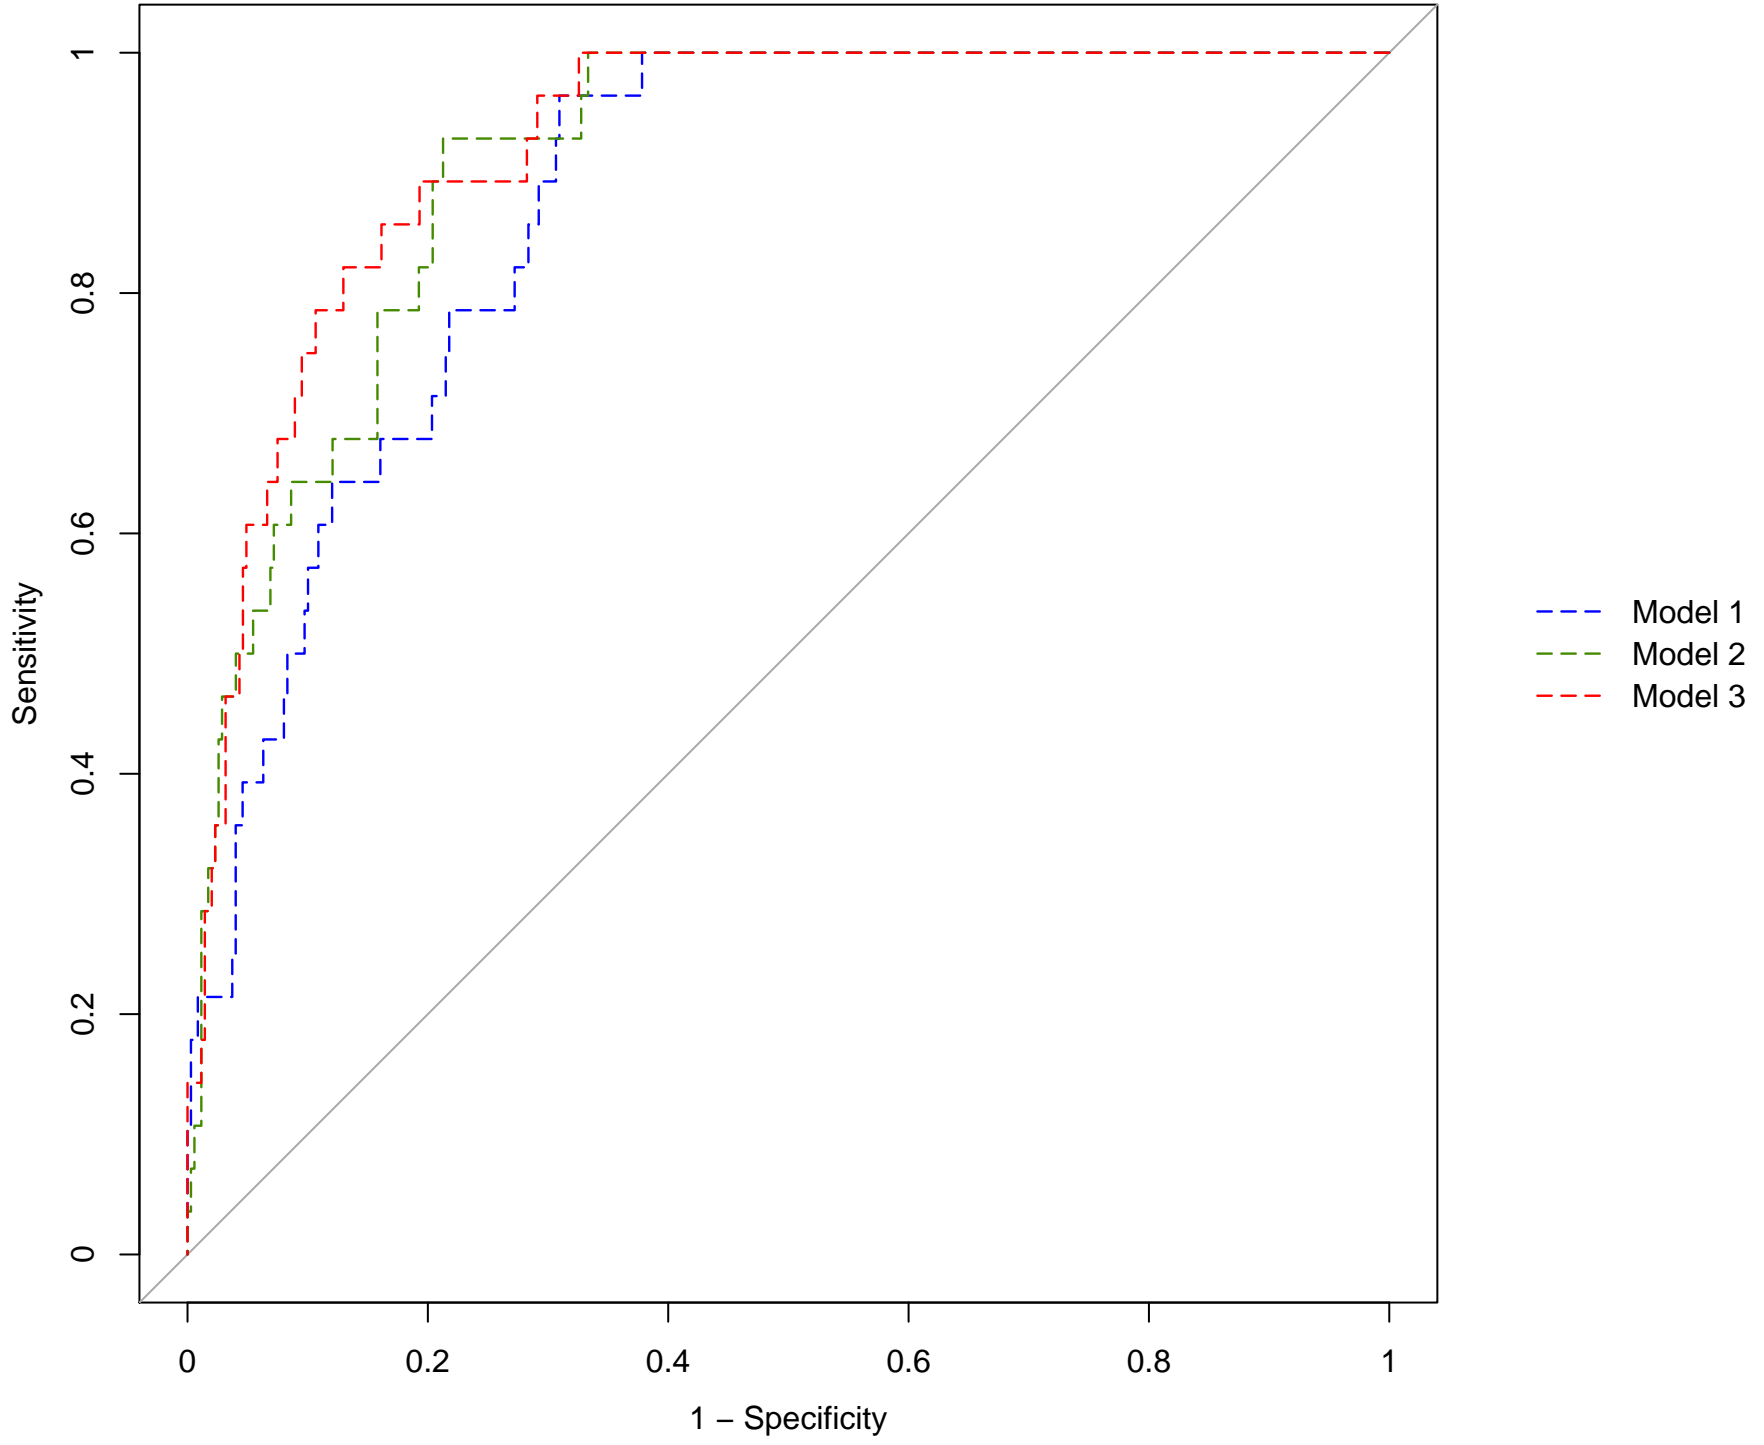

ROC curve – MRI base

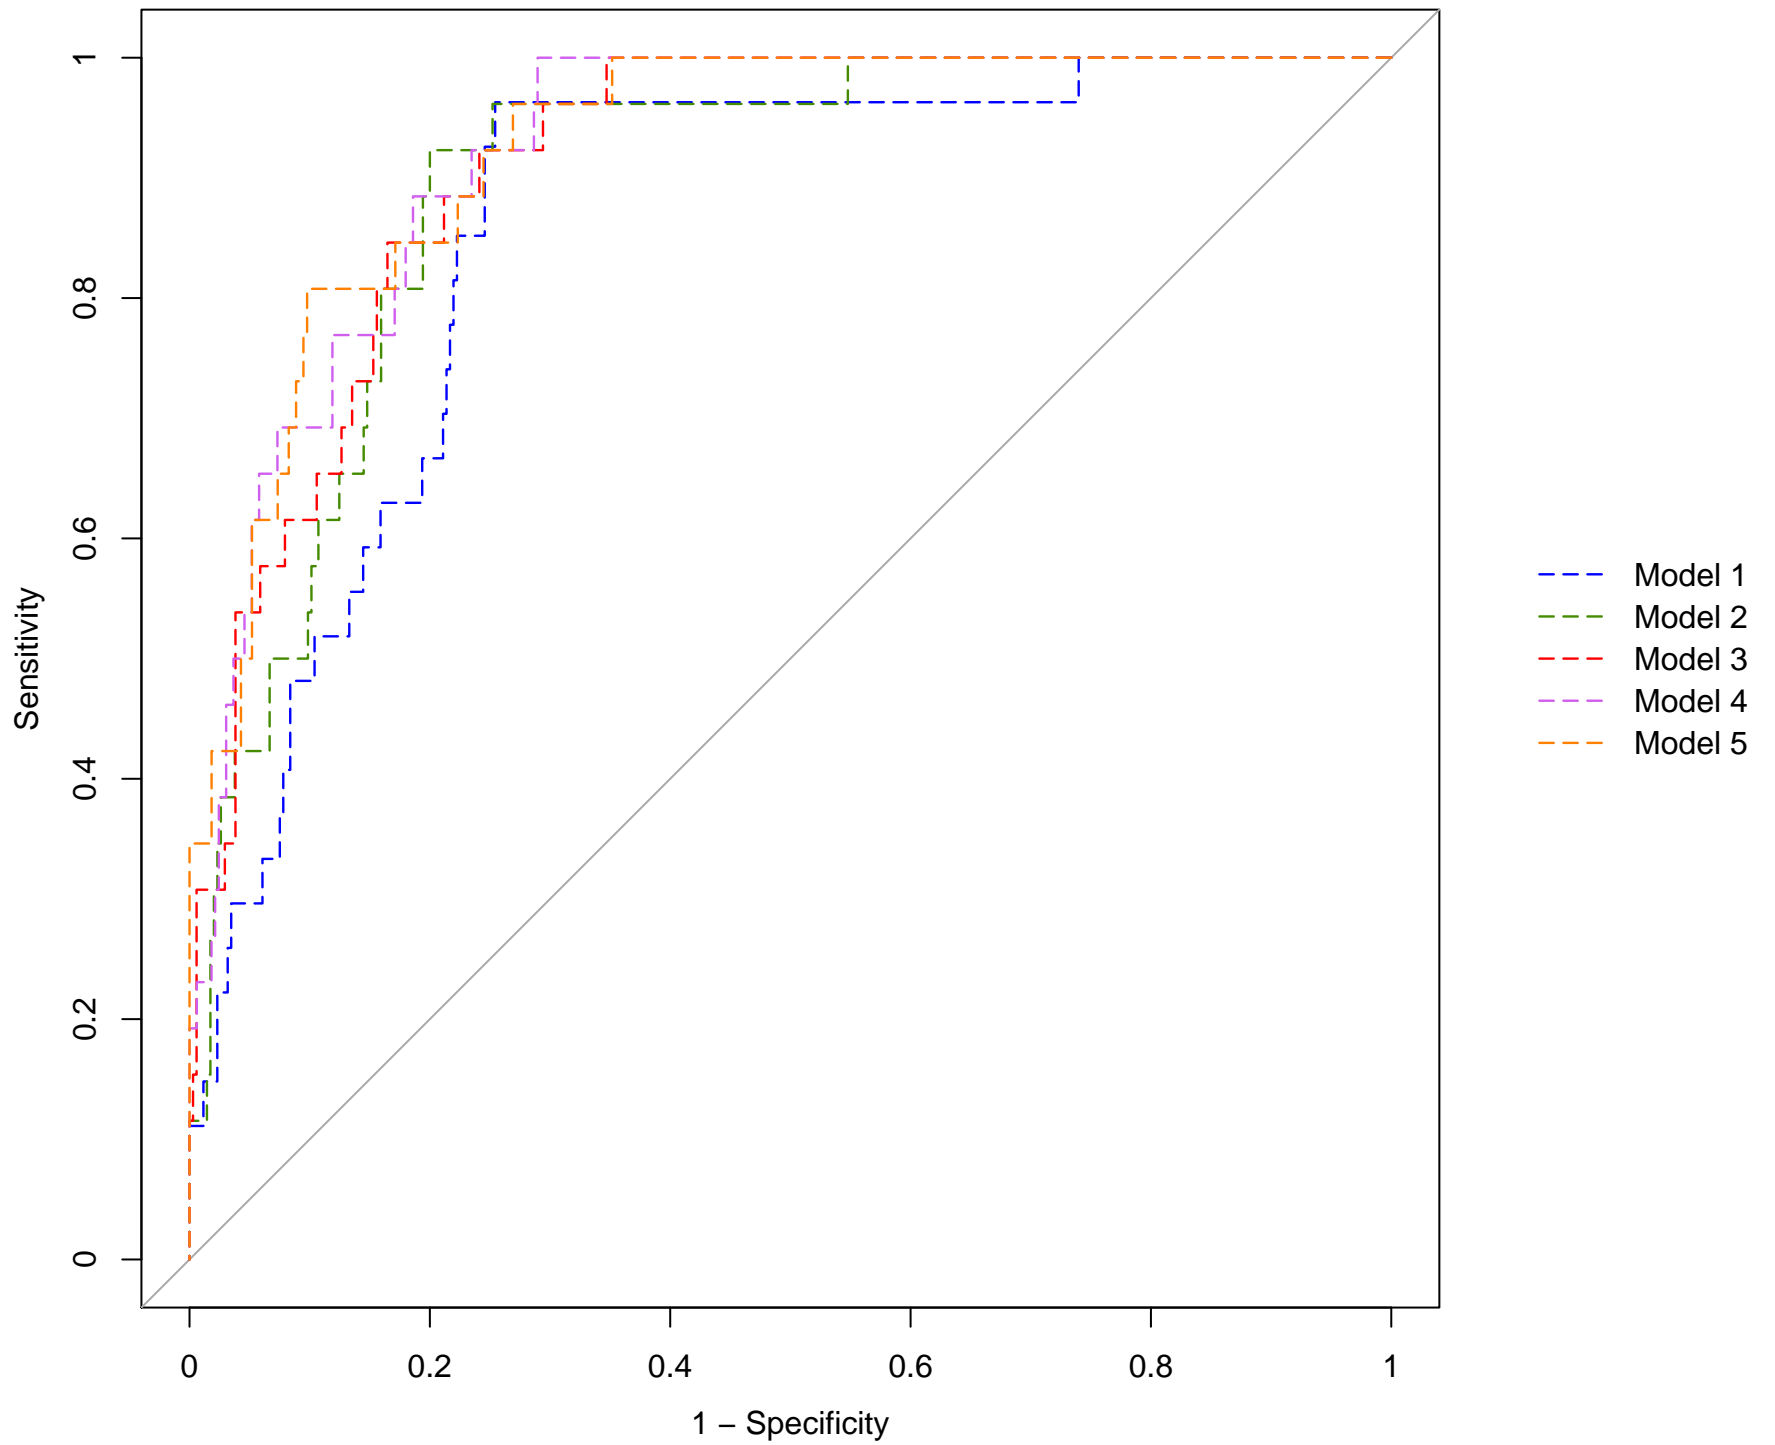

Supplement: jad-64-jad180199-s003.pdf [file jad-64-jad180199-s003.pdf]
